# Supplementary material for: A Metabolomics-Guided Machine Learning Model for Diagnosis and Differential Diagnosis of Diabetic Kidney Disease: A Dual-Center Study
Source: Research Square preprint supplement (doi:10.21203/rs.3.rs-7347937/v1), 2025-09-22
Supplement: Supplementary file 1 [file c370f5f61e4fdf3e57711eed.docx]

Supplementary Table S1 Baseline analysis of DKD and diabetes mellitus

| Characteristics | Diabetes | DKD | p |
| --- | --- | --- | --- |
|  | N=271 | N=274 |  |
| age (years) | 57.66 (12.85) | 63.09 (11.74) | <0.01 |
| hypertension (%) |  |  | <0.01 |
| yes | 157 (57.93%) | 63 (22.99%) |  |
| no | 114 (42.07%) | 211 (77.01%) |  |
| gender (%) |  |  | 0.67 |
| female | 104 (38.38%) | 111 (40.51%) |  |
| male | 167 (61.62%) | 163 (59.49%) |  |
| height (cm) | 170.00 [162.00, 176.00] | 168.00 [160.25, 175.00] | 0.04 |
| weight (kg) | 74.00 [65.00, 83.00] | 74.00 [65.00, 82.00] | 0.57 |
| BMI (kg/m2) | 25.80 [23.41, 27.81] | 25.92 [23.84, 28.31] | 0.46 |
| SBP (mm Hg) | 139.00 [128.50, 151.50] | 151.50 [138.25, 166.75] | <0.01 |
| DBP (mm Hg) | 85.00 [79.00, 91.00] | 85.00 [78.00, 92.00] | 0.99 |
| 1,5-AG (μg/ml) | 1.30 [0.62, 2.78] | 2.12 [0.96, 4.03] | <0.01 |
| UCRE (mmol/L) | 111.40 [67.40, 160.55] | 58.14 [41.74, 91.17] | <0.01 |
| ACR (mg/g) | 11.51 [7.23, 21.71] | 1094.43 [76.93, 3629.93] | <0.01 |
| MAU (mg/L) | 12.40 [7.50, 22.95] | 637.93 [67.70, 2091.22] | <0.01 |
| Scre (μmol/L) | 59.00 [49.00, 66.50] | 130.00 [69.00, 309.00] | <0.01 |
| Urea (μmol/L]) | 5.78 [4.98, 6.78] | 10.65 [6.83, 20.12] | <0.01 |
| UA (μmol/L) | 314.00 [265.50, 375.50] | 399.00 [316.00, 474.00] | <0.01 |
| eGFR (ml/min*1.73m2) | 106.34 [96.45, 119.22] | 45.95 [14.74, 91.29] | <0.01 |
| HDL (mmol/L) | 0.98 [0.84, 1.17] | 0.95 [0.78, 1.17] | 0.12 |
| LDL (mmol/L) | 2.69 [2.22, 3.23] | 2.69 [1.97, 3.36] | 0.33 |
| TG (mmol/L) | 1.57 [1.11, 2.22] | 1.69 [1.19, 2.58] | 0.31 |
| TC (mmol/L) | 4.76 [4.12, 5.69] | 4.78 [3.83, 5.80] | 0.47 |
| Glu (mmol/L) | 8.25 [6.36, 10.12] | 6.50 [4.89, 8.86] | <0.01 |
| HbA1c (%) | 9.20 [7.85, 11.00] | 8.00 [6.80, 9.60] | <0.01 |
| C14:0 (nmol/ml) | 66.87 [43.32, 102.36] | 45.41 [29.11, 74.21] | <0.01 |
| C16:0 (nmol/ml) | 5206.89 [4569.76, 6364.58] | 4757.08 [3981.45, 5729.14] | <0.01 |
| C16:1 (nmol/ml) | 139.56 [96.54, 205.73] | 113.83 [81.98, 163.41] | <0.01 |
| C18:3 (nmol/ml) | 152.00 [105.76, 232.18] | 139.89 [99.00, 197.47] | 0.06 |
| C18:2 (nmol/ml) | 5400.53 [4233.64, 6921.64] | 5161.72 [3664.80, 6898.09] | 0.09 |
| C18:1 (nmol/ml) | 2226.41 [1654.33, 2998.66] | 2197.10 [1634.55, 2990.65] | 0.73 |
| C18:0 (nmol/ml) | 1822.25 [1589.15, 2100.55] | 1640.00 [1377.37, 1901.32] | <0.01 |
| C20:5 (nmol/ml) | 112.87 [67.87, 199.04] | 83.01 [48.37, 145.04] | <0.01 |
| C20:4 (nmol/ml) | 1620.26 [1336.89, 2542.92] | 1611.40 [1153.78, 2627.26] | 0.15 |
| C20:3 (nmol/ml) | 146.02 [110.53, 201.56] | 127.15 [95.71, 170.95] | <0.01 |
| C20:2 (nmol/ml) | 29.97 [24.04, 39.31] | 28.96 [22.50, 38.17] | 0.13 |
| C20:1 (nmol/ml) | 15.65 [12.20, 19.55] | 15.76 [11.99, 21.48] | 0.67 |
| C20:0 (nmol/ml) | 46.55 [36.94, 59.35] | 42.94 [33.15, 53.38] | <0.01 |
| C22:6 (nmol/ml) | 496.74 [327.78, 805.75] | 394.41 [251.50, 798.82] | 0.01 |
| C22:5 (nmol/ml) | 107.39 [72.45, 171.06] | 86.85 [61.76, 150.60] | 0.01 |
| C22:4 (nmol/ml) | 26.67 [18.66, 40.75] | 26.15 [18.79, 40.97] | 0.51 |
| C22:0 (nmol/ml) | 53.51 [41.83, 74.86] | 45.49 [32.20, 63.10] | <0.01 |
| C24:1 (nmol/ml) | 85.48 [66.04, 110.75] | 84.59 [65.96, 107.63] | 0.97 |
| C24:0(nmol/ml) | 58.08 [43.07, 79.60] | 48.44 [34.79, 66.23] | <0.01 |
| ω3/ω6 | 0.11 [0.08, 0.14] | 0.10 [0.08, 0.13] | <0.01 |
| TrieneTetraene | 0.02 [0.01, 0.02] | 0.02 [0.01, 0.02] | 0.05 |
| TotalSFA (nmol/ml) | 7256.18 [6481.54, 8799.61] | 6607.10 [5563.42, 7864.21] | <0.01 |
| TotalMUFA (nmol/ml) | 2487.20 [1840.88, 3318.46] | 2414.96 [1812.76, 3270.80] | 0.54 |
| TotalPUFA (nmol/ml) | 8269.33 [6517.07, 11277.50] | 7829.63 [5658.34, 11114.28] | 0.06 |
| TotalFA (nmol/ml) | 18710.40 [15692.27, 22010.24] | 17189.59 [13866.99, 21564.74] | <0.01 |
| Tω3 (nmol/ml) | 782.69 [531.14, 1228.76] | 651.34 [420.80, 1160.97] | <0.01 |
| Tω6 (nmol/ml) | 7182.19 [5640.39, 9633.05] | 6945.78 [4994.15, 9657.59] | 0.11 |

Abbreviations: BMI, body mass index; DBP, diastolic blood pressure ; SBP, systolic diastolic blood pressure; MAU ,urinary microalbumin; ACR , urine albumin-creatinine ratio ; UCRE , urinary creatinine; Scre , serum creatinine; UA, uric acid; eGFR, estimated glomerular filtration rate; Glu, glucose; HbAlc, glycated hemoglobin; HDLC, high-density lipoprotein cholesterol; LDLC, low-density lipoprotein cholesterol；TC, total cholesterl; TG, triacylglycerol; 1,5-AG, 1,5-anhydroglucitol.

Supplementary Table S2 External validation queue baseline

| Characteristics | Diabetes | DKD | p |
| --- | --- | --- | --- |
|  | N=60 | N=60 |  |
| age (years) | 52.683±11.931 | 67.550±12.294 | <0.01 |
| hypertension (%) |  |  | <0.01 |
| yes | 45 (75.00%) | 25 (41.67%) |  |
| no | 15 (25.00%) | 35 (58.33%) |  |
| gender (%) |  |  | 0.85 |
| female | 26 (43.33%) | 28 (46.67%) |  |
| male | 34 (56.67%) | 32 (53.33%) |  |
| height (cm) | 169.117±7.715 | 166.533±8.738 | 0.09 |
| weight (kg) | 71.500 [63.000, 80.000] | 70.000 [63.750, 80.250] | 0.96 |
| BMI (kg/m2) | 25.048 [22.182, 27.365] | 25.936 [24.099, 27.524] | 0.16 |
| SBP (mm Hg) | 134.117 ±15.413 | 149.833±20.694 | <0.01 |
| DBP (mm Hg) | 80.500 [75.000, 88.500] | 83.500 [76.000, 90.000] | 0.59 |
| 1,5-AG (μg/ml) | 2.040 [0.675, 3.885] | 1.440 [0.875, 3.725] | 0.88 |
| UCRE (mmol/L) | 114.990 [74.563, 162.332] | 77.336 [50.710, 112.588] | <0.01 |
| ACR (mg/g) | 16.974 [8.990, 22.640] | 233.715 [64.665, 961.216] | <0.01 |
| MAU (mg/L) | 19.145 [11.142, 26.757] | 150.350 [52.880, 907.060] | <0.01 |
| Scre (μmol/L) | 59.385 [51.058, 70.083] | 89.965 [78.330, 108.015] | <0.01 |
| Urea (μmol/L) | 5.950 [4.947, 6.623] | 7.670 [6.247, 9.280] | <0.01 |
| UA (μmol/L) | 332.595 ±97.084 | 369.072±94.536 | 0.04 |
| eGFR (ml/min*1.73m2) | 106.707 [102.557, 118.068] | 71.706 [51.482, 83.399] | <0.01 |
| HDL (mmol/L) | 1.080 [0.898, 1.230] | 1.145 [1.005, 1.360] | 0.03 |
| LDL (mmol/L) | 3.050±0.843 | 2.881±0.981 | 0.31 |
| TG (mmol/L) | 1.895 [1.415, 2.732] | 1.770 [1.240, 2.640] | 0.44 |
| TC (mmol/L) | 5.243±1.108 | 5.150±1.255 | 0.67 |
| Glu (mmol/L) | 8.020 [6.630, 10.020] | 8.145 [6.573, 12.028] | 0.30 |
| HBA1C (%) | 8.600 [7.300, 10.125] | 9.000 [7.775, 10.025] | 0.70 |
| C14:0(nmol/ml) | 82.469 [50.467, 122.987] | 75.216 [52.196, 106.393] | 0.53 |
| C16:0(nmol/ml) | 5267.280 [4509.136, 6683.443] | 5645.729 [4692.152, 6798.017] | 0.56 |
| C16:1 (nmol/ml) | 154.328 [102.725, 227.766] | 149.921 [106.021, 206.876] | 0.92 |
| C18:3 (nmol/ml) | 131.960 [97.274, 186.196] | 135.478 [93.452, 192.578] | 0.76 |
| C18:2 (nmol/ml) | 4886.004 [4157.029, 5658.591] | 4545.107 [3666.794, 5303.507] | 0.17 |
| C18:1 (nmol/ml) | 2258.051 [1830.914, 3212.717] | 2215.788 [1693.746, 3025.106] | 0.55 |
| C18:0 (nmol/ml) | 1909.875 [1725.987, 2166.395] | 2083.220 [1810.720, 2477.954] | 0.02 |
| C20:5 (nmol/ml) | 81.045 [50.190, 119.750] | 74.978 [47.345, 130.694] | 0.74 |
| C20:4 (nmol/ml) | 1425.227 [1231.837, 1690.473] | 1329.037 [1109.617, 1574.547] | 0.21 |
| C20:3 (nmol/ml) | 137.641 [102.468, 187.543] | 111.579 [90.843, 146.593] | <0.01 |
| C20:2 (nmol/ml) | 27.747 [23.018, 37.275] | 28.696 [24.246, 37.822] | 0.30 |
| C20:1 (nmol/ml) | 16.152 [12.641, 23.347] | 16.772 [14.248, 22.260] | 0.52 |
| C20:0 (nmol/ml) | 58.439 [47.065, 69.779] | 53.787 [44.292, 61.938] | 0.06 |
| C22:6 (nmol/ml) | 361.243 [304.871, 459.177] | 306.796 [210.122, 413.234] | 0.01 |
| C22:5 (nmol/ml) | 93.155 [75.545, 111.849] | 81.884 [61.144, 103.128] | 0.04 |
| C22:4 (nmol/ml) | 24.711 [19.719, 33.091] | 24.605 [20.022, 31.704] | 0.94 |
| C22:0 (nmol/ml) | 55.206 [43.515, 73.581] | 67.571 [54.515, 92.371] | <0.01 |
| C24:1(nmol/ml) | 87.842 [75.460, 105.273] | 111.313 [94.789, 124.334] | <0.01 |
| C24:0(nmol/ml) | 65.91 [50.93, 84.46] | 70.47 [58.13, 96.26] | 0.08 |
| ω3/ω6 | 0.093 [0.078, 0.116] | 0.091 [0.074, 0.121] | 0.71 |
| Triene /Tetraene | 0.021 [0.015, 0.026] | 0.017 [0.013, 0.022] | <0.01 |
| TotalSFA (nmol/ml) | 7397.854 [6498.413, 9298.403] | 8138.716 [6796.310, 9296.855] | 0.32 |
| TotalMUFA(nmol/ml) | 2493.395 [2079.334, 3545.116] | 2464.225 [1947.822, 3355.613] | 0.62 |
| TotalPUFA(nmol/ml) | 7246.026 [6138.609, 8177.738] | 6725.624 [5427.749, 7967.990] | 0.13 |
| TotalFA (nmol/ml) | 17443.784 [15261.990, 20596.049] | 17632.122 [14609.334, 20125.549] | 0.77 |
| Tω3(nmol/ml) | 615.421 [460.337, 755.303] | 526.204 [364.829, 810.814] | 0.24 |
| Tω6 (nmol/ml) | 6287.527 [5440.878, 7249.512] | 5967.013 [4878.562, 7090.544] | 0.18 |

Abbreviations: BMI, body mass index; DBP, diastolic blood pressure ; SBP, systolic diastolic blood pressure; MAU ,urinary microalbumin; ACR , urine albumin-creatinine ratio ; UCRE , urinary creatinine; Scre , serum creatinine; UA, uric acid; eGFR, estimated glomerular filtration rate; Glu, glucose; HbAlc, glycated hemoglobin; HDLC, high-density lipoprotein cholesterol; LDLC, low-density lipoprotein cholesterol；TC, total cholesterl; TG, triacylglycerol; 1,5-AG, 1,5-anhydroglucitol.

Supplementary Table S3 Baseline analysis of DKD and non-DKD chronic kidney disease

| Characteristics | non-DKD chronic kidney disease | DKD | *p* |
| --- | --- | --- | --- |
|  | N=199 | N=199 |  |
| age (years) | 61.00 [50.00, 72.00] | 63.50 [58.00, 70.00] | 0.09 |
| hypertension (%) |  |  | 0.15 |
| yes | 38 (19.10) | 20 (12.82) |  |
| no | 161 (80.90) | 136 (87.18) |  |
| gender (%) |  |  | 1 |
| female | 78 (39.20) | 61 (39.10) |  |
| male | 121 (60.80) | 95 (60.90) |  |
| height (cm) | 169.00 [162.00, 173.00] | 170.00 [161.50, 175.00] | 0.66 |
| weight (kg) | 70.00 [60.00, 79.00] | 73.50 [65.00, 83.25] | <0.01 |
| BMI (kg/m2) | 24.57 [21.97, 27.22] | 26.23 [23.65, 29.32] | <0.01 |
| SBP (mm Hg) | 148.00 [137.00, 161.00] | 155.00 [140.00, 170.00] | 0.01 |
| DBP (mm Hg) | 86.00 [78.50, 96.00] | 85.50 [78.00, 93.00] | 0.49 |
| 1,5-AG (μg/ml) | 7.91 [4.33, 16.19] | 2.91 [1.80, 4.82] | <0.01 |
| Scre (μmol/L) | 291.00 [154.00, 497.50] | 272.00 [171.75, 463.50] | 0.93 |
| Urea (μmol/L) | 17.99 [11.16, 28.50] | 18.19 [12.99, 24.80] | 0.62 |
| UA (μmol/L) | 444.00 [379.00, 530.50] | 444.50 [386.75, 509.00] | 0.91 |
| eGFR (ml/min*1.73m2) | 18.04 [9.23, 39.17] | 17.06 [10.12, 34.80] | 0.8 |
| HDL (mmol/L) | 0.95 [0.82, 1.12] | 0.91 [0.74, 1.12] | 0.07 |
| LDL (mmol/L) | 2.30 [1.96, 2.91] | 2.62 [1.89, 3.33] | 0.05 |
| TG (mmol/L) | 1.28 [0.86, 1.89] | 1.65 [1.15, 2.41] | <0.01 |
| TC (mmol/L) | 4.34 [3.64, 5.13] | 4.77 [3.58, 5.91] | 0.04 |
| Glu (mmol/L) | 4.66 [4.42, 5.03] | 5.54 [4.60, 7.87] | <0.01 |
| C14:0(nmol/ml) | 47.82 [31.93, 72.99] | 38.51 [26.73, 63.06] | 0.02 |
| C16:0(nmol/ml) | 4992.44 [4402.13, 6067.89] | 4895.11 [4192.25, 5834.85] | 0.1 |
| C16:1(nmol/ml) | 134.58 [96.80, 202.26] | 106.49 [78.37, 145.51] | <0.01 |
| C18:3(nmol/ml) | 114.11 [79.96, 181.08] | 139.35 [88.13, 198.19] | 0.04 |
| C18:2(nmol/ml) | 4630.38 [3593.77, 5731.54] | 5164.85 [3689.32, 7122.15] | 0.01 |
| C18:1(nmol/ml) | 2039.39 [1576.93, 2999.46] | 2270.89 [1736.79, 3066.48] | 0.1 |
| C18:0(nmol/ml) | 1842.82 [1541.85, 2094.84] | 1729.94 [1452.70, 2039.89] | 0.03 |
| C20:5(nmol/ml) | 45.65 [30.59, 80.48] | 76.91 [39.08, 122.27] | <0.01 |
| C20:4(nmol/ml) | 1285.38 [1054.40, 1598.43] | 1621.57 [1123.49, 2756.86] | <0.01 |
| C20:3(nmol/ml) | 118.10 [93.44, 161.96] | 125.81 [92.02, 173.34] | 0.27 |
| C20:2(nmol/ml) | 28.21 [22.62, 39.03] | 30.47 [23.23, 38.40] | 0.29 |
| C20:1(nmol/ml) | 15.05 [11.23, 19.24] | 16.73 [12.80, 22.71] | 0.01 |
| C20:0(nmol/ml) | 49.93 [41.63, 61.80] | 46.44 [36.74, 56.81] | <0.01 |
| C22:6(nmol/ml) | 277.32 [202.45, 379.27] | 395.94 [245.29, 744.40] | <0.01 |
| C22:5(nmol/ml) | 68.70 [54.42, 91.83] | 91.12 [62.55, 162.51] | <0.01 |
| C22:4(nmol/ml) | 21.32 [16.30, 28.43] | 26.47 [19.09, 42.86] | <0.01 |
| C24:0(nmol/ml) | 44.20 [31.98, 72.21] | 52.24 [34.70, 68.76] | 0.38 |
| ω3/ω6 | 94.43 [77.49, 114.64] | 94.49 [75.95, 118.60] | 0.95 |
| Triene /Tetraene | 51.12 [36.50, 74.95] | 51.12 [37.55, 72.18] | 0.96 |
| TotalSFA(nmol/ml) | 0.08 [0.06, 0.10] | 0.09 [0.07, 0.12] | <0.01 |
| TotalMUFA  (nmol/ml) | 0.02 [0.01, 0.02] | 0.02 [0.01, 0.02] | <0.01 |
| TotalPUFA(nmol/ml) | 7086.65 [6239.71, 8347.05] | 6803.28 [5794.08, 8059.20] | 0.04 |
| TotalFA(nmol/ml) | 2283.34 [1789.82, 3336.29] | 2471.65 [1897.80, 3333.39] | 0.2 |
| Tω3(nmol/ml) | 6540.43 [5531.62, 8097.00] | 7891.32 [5733.20, 11336.35] | <0.01 |
| Tω6(nmol/ml) | 16216.13 [13733.27, 19828.17] | 17358.36 [14053.58, 21740.62] | 0.02 |

Abbreviations: BMI, body mass index; DBP, diastolic blood pressure ; SBP, systolic diastolic blood pressure; Scre , serum creatinine; UA, uric acid; eGFR, estimated glomerular filtration rate; Glu, glucose; HbAlc, glycated hemoglobin; HDLC, high-density lipoprotein cholesterol; LDLC, low-density lipoprotein cholesterol；TC, total cholesterl; TG, triacylglycerol; 1,5-AG, 1,5-anhydroglucitol.

Supplementary Table S4 Baseline analysis of early versus late DKD

| Characteristics | early DKD | late DKD | *p* |
| --- | --- | --- | --- |
|  | N=162 | N=112 |  |
| age (years) | 62.17±11.73 | 64.42±11.67 | 0.12 |
| hypertension (%) |  |  | <0.01 |
| yes | 113 (69.75) | 98 (87.50) |  |
| no | 49 (30.25) | 14 (12.50) |  |
| gender (%) |  |  | 0.97 |
| female | 65 (40.12) | 46 (41.07) |  |
| male | 97 (59.88) | 66 (58.93) |  |
| height (cm) | 169.00 [162.00, 175.00] | 167.00 [160.00, 174.00] | 0.2 |
| weight (kg) | 75.14 (13.81) | 72.98 (16.67) | 0.26 |
| BMI (kg/m2) | 25.94 [24.18, 27.81] | 25.95 [23.20, 29.38] | 0.89 |
| SBP (mm Hg) | 147.50 [134.00, 160.00] | 160.00 [142.00, 172.00] | <0.01 |
| DBP(mm Hg) | 85.00 [78.00, 90.75] | 85.00 [78.00, 93.00] | 0.48 |
| 1,5-AG(μg/ml) | 1.26 [0.67, 2.79] | 3.24 [2.10, 4.84] | <0.01 |
| UCRE (mmol/L) | 68.18 [48.93, 116.43] | 48.76 [36.00, 65.13] | <0.01 |
| ACR (mg/g) | 84.90 [46.43, 351.80] | 3577.53 [2297.80, 4894.67] | <0.01 |
| MAU (mg/L) | 83.50 [35.42, 290.75] | 1867.18 [911.30, 2455.34] | <0.01 |
| Scre (μmol/L) | 76.50 [56.25, 108.50] | 373.00 [257.75, 532.25] | <0.01 |
| Urea (μmol/L]) | 7.58 [6.02, 9.89] | 22.24 [16.34, 26.71] | <0.01 |
| UA (μmol/L) | 358.00 [290.00, 417.00] | 452.00 [391.75, 514.75] | <0.01 |
| eGFR (ml/min*1.73m2) | 85.17 [55.49, 102.31] | 12.84 [8.27, 17.80] | <0.01 |
| HDL (mmol/L) | 1.00 [0.83, 1.20] | 0.91 [0.69, 1.10] | <0.01 |
| LDL (mmol/L) | 2.79 [2.10, 3.35] | 2.52 [1.77, 3.22] | 0.07 |
| TG (mmol/L) | 1.81 [1.22, 2.70] | 1.45 [1.11, 2.24] | 0.05 |
| TC (mmol/L) | 4.87 [4.02, 5.80] | 4.57 [3.41, 5.80] | 0.12 |
| Glu (mmol/L) | 7.80 [5.79, 10.01] | 5.25 [4.33, 6.97] | <0.01 |
| HbA1c (%) | 9.10 [7.90, 10.70] | 6.80 [5.88, 7.50] | <0.01 |
| C14:0 (nmol/ml) | 58.21 [36.77, 88.50] | 34.14 [25.84, 56.14] | <0.01 |
| C16:0 (nmol/ml) | 4738.04 [3947.99, 5558.03] | 4801.74 [4192.25, 5857.24] | 0.16 |
| C16:1 (nmol/ml) | 127.94 [86.01, 179.29] | 97.80 [72.05, 131.27] | <0.01 |
| C18:3 (nmol/ml) | 151.55 [110.77, 214.37] | 121.41 [83.60, 176.22] | <0.01 |
| C18:2 (nmol/ml) | 5269.15 [3997.08, 6798.60] | 4965.86 [3512.22, 7015.65] | 0.39 |
| C18:1 (nmol/ml) | 2270.16 [1592.33, 2960.56] | 2151.64 [1645.18, 3023.32] | 0.77 |
| C18:0 (nmol/ml) | 1609.10 [1361.71, 1865.17] | 1699.63 [1460.89, 2034.33] | 0.03 |
| C20:5 (nmol/ml) | 103.42 [59.92, 182.38] | 66.21 [34.82, 105.14] | <0.01 |
| C20:4 (nmol/ml) | 1670.35 [1188.83, 2627.26] | 1514.55 [1072.50, 2655.44] | 0.17 |
| C20:3 (nmol/ml) | 132.49 [103.73, 173.27] | 117.74 [89.92, 162.47] | 0.04 |
| C20:2 (nmol/ml) | 29.02 [22.67, 38.90] | 28.48 [22.23, 37.66] | 0.78 |
| C20:1 (nmol/ml) | 15.71 [12.34, 21.61] | 15.76 [11.95, 21.31] | 0.74 |
| C20:0 (nmol/ml) | 40.43 [31.02, 49.33] | 47.00 [37.43, 60.27] | <0.01 |
| C22:6 (nmol/ml) | 404.79 [269.18, 906.99] | 380.00 [227.86, 655.95] | 0.04 |
| C22:5 (nmol/ml) | 90.07 [62.38, 153.18] | 82.54 [57.29, 147.29] | 0.37 |
| C22:4 (nmol/ml) | 26.50 [18.88, 36.03] | 25.03 [18.90, 42.10] | 0.78 |
| C22:0 (nmol/ml) | 45.82 [31.08, 60.25] | 45.16 [33.45, 73.35] | 0.31 |
| C24:1 (nmol/ml) | 77.35 [59.72, 98.92] | 93.42 [75.31, 118.83] | <0.01 |
| C24:0 (nmol/ml) | 49.04 [33.61, 60.30] | 48.09 [36.91, 72.18] | 0.13 |
| ω3/ω6 | 0.11 [0.08, 0.14] | 0.09 [0.07, 0.11] | <0.01 |
| Triene /Tetraene | 0.02 [0.01, 0.02] | 0.02 [0.01, 0.02] | 0.53 |
| TotalSFA (nmol/ml) | 6578.69 [5492.40, 7563.39] | 6749.28 [5862.51, 8079.06] | 0.13 |
| TotalMUFA (nmol/ml) | 2486.21 [1785.86, 3262.38] | 2376.03 [1828.20, 3282.17] | 0.69 |
| TotalPUFA (nmol/ml) | 8032.20 [5762.24, 11250.06] | 7270.40 [5202.36, 10624.33] | 0.17 |
| TotalFA (nmol/ml) | 17437.30 [14027.38, 21425.36] | 16714.72 [13581.92, 21740.62] | 0.6 |
| Tω3 (nmol/ml) | 710.44 [461.88, 1267.47] | 570.06 [360.54, 906.39] | <0.01 |
| Tω6 (nmol/ml) | 7010.43 [5159.28, 9697.35] | 6422.10 [4640.67, 9213.63] | 0.31 |

Abbreviations: BMI, body mass index; DBP, diastolic blood pressure ; SBP, systolic diastolic blood pressure; MAU ,urinary microalbumin; ACR , urine albumin-creatinine ratio ; UCRE , urinary creatinine; Scre , serum creatinine; UA, uric acid; eGFR, estimated glomerular filtration rate; Glu, glucose; HbAlc, glycated hemoglobin; HDLC, high-density lipoprotein cholesterol; LDLC, low-density lipoprotein cholesterol；TC, total cholesterl; TG, triacylglycerol; 1,5-AG, 1,5-anhydroglucitol.

Supplementary Table S5 Correlation between 1,5-AG and renal function

| Characteristics | 1,5-AG | |
| --- | --- | --- |
|  | **r** | p |
| HDL (mmol/L) | -0.17 | 0.01 |
| LDL (mmol/L) | -0.24 | <0.01 |
| TG (mmol/L) | -0.24 | <0.01 |
| TC (mmol/L) | -0.24 | <0.01 |
| Scre (μmol/L) | 0.46 | <0.01 |
| Urea (μmol/L) | 0.47 | <0.01 |
| UA (μmol/L) | 0.37 | <0.01 |
| eGFR (ml/min*1.73m2) | -0.48 | <0.01 |
| Glu (mmol/L) | -0.4 | <0.01 |

Abbreviations: Scre , serum creatinine; UA, uric acid; eGFR, estimated glomerular filtration rate; Glu, glucose; HDLC, high-density lipoprotein cholesterol; LDLC, low-density lipoprotein cholesterol；TC, total cholesterl; TG, triacylglycerol; 1,5-AG, 1,5-anhydroglucitol.
